# Supplementary material for: Acute Local Irritation Potential of a Novel Citrate-Based Irrigation Solution for Surgical Procedures: An In Situ Evaluation in a Rabbit Model
Source: Research Square preprint supplement (doi:10.21203/rs.3.rs-6843131/v1), 2025-07-25
Supplement: Supplementary file 1 [file c0dce0cee96e73664eb86af2.docx]

**Supplementary Tables**

**Supplementary Table 1. Macroscopic Necropsy Observations Following Test or Control Solution Exposure of Articular Cartilage and Mesentery**

| **Group** | **Time Point – Post Irrigation** | **Animal Number** | **Macroscopic Observations** |
| --- | --- | --- | --- |
| 1 - Control | 30 Minutes | 51638 | Macroscopically normal |
| 51639 | Macroscopically normal |
| 51640 | Macroscopically normal |
| 24 Hours | 51644 | Mucosal surface of the trachea was multifocally red. |
| 51645 | Lungs were mottled red and pink; mild amount of edema in thoracic fat; thoracic cavity had ~3 mL of clear, thin fluid; mucosal surface of the trachea was diffusely red and slightly edematous; trachea was partially filled with white foamy material. |
| 51646 | Mucosal surface of the trachea was diffusely red and slightly edematous. |
| 7 Days | 51650 | ~1 cm x 2 cm focus of red discoloration on the lateral side of the knee at the surgery site. |
| 51651 | Macroscopically normal |
| 51652 | ~1 cm x 2 cm focus of dark red discoloration in the muscle on the lateral side of the knee at the surgery site. |
| 2 - Test | 30 Minutes | 51641 | Macroscopically normal |
| 51642 | Macroscopically normal |
| 51643 | Macroscopically normal |
| 24 Hours | 51647 | Vasculature of the intestines was diffusely congested and mesentery fat was light pink; mucosal surface of the trachea was mottled red; 1.3 x 0.5 x 0.1 cm blood clot adhered to the ventral surface of the brain stem. |
| 51648 | Small amount of red/brown granular material adhered to abdominal muscle adjacent to the abdominal incision (internally); small amount of hemorrhage at the mesentery suture; mucosal surface of the trachea was diffusely red and slightly edematous. |
| 51649 | Abdominal wall was diffusely red; section of abdominal wall was collected; small amount of red/brown granular material adhered to the abdominal incision (internally); mucosal surface of the trachea was diffusely red. |
| 7 Days | 51654 | ~1 cm x 2 cm dark red focus on lateral muscle of knee at the surgery site. |
| 51655 | ~1 cm x 2 cm focus of dark red discoloration on lateral side of the knee at the surgery site. |
| 51656 | ~1 cm x 2 cm focus of dark red discoloration on lateral side of the knee at the surgery site. |

**Supplementary Table 2. Macroscopic Necropsy Observations Following Irrigation of Cranial Dura Mater**

| **Group** | **Time Point- Post Irrigation** | **Animal Number** | **Macroscopic Observations** |
| --- | --- | --- | --- |
| 3 - Control | 30 Minutes | 51657 | Mucosal surface of the trachea was diffusely red. |
| 51658 | Small nick was made in the right side of the dura mater during surgery; mucosal surface of the trachea was diffusely red. |
| 51659 | Mucosal surface of the trachea was diffusely red. |
| 24 Hours | 51601 | Macroscopically normal. |
| 51602 | Macroscopically normal. |
| 51603 | Macroscopically normal. |
| 7 Days | 51607 | ~1.5 x 1.0 cm flap of bone in defect on caudal midline calvarium, secured with cruciate suture; approximately 0.5 cm diameter region of slightly thickened, opaque white dura mater on the subjacent dura; collected mesentery rather than abdominal wall due to lack of adhesions. |
| 51608 | Approximately 1.0 x 1.0 cm bone flap sutured to defect in caudal midline calvarium; narrow dark red rim at superficial defect surface; no adhesions present, so abdominal wall was not collected. |
| 51609 | 1.5 x 1.0 cm skull flap sutured to defect in caudal medial calvarium; 0.5 cm diameter dark red flat focus rostral to defect dorsally; no adhesions present, so abdominal wall was not collected. |
| 4 - Test | 30 Minutes | 51600 | Mucosal surface of the trachea was diffusely red. |
| 51661 | Mucosal surface of the trachea was diffusely red. |
| 51660 | Mucosal surface of the trachea was diffusely red. |
| 24 Hours | 51604 | Macroscopically normal. |
| 51605 | Blood clot in dural space. |
| 51606 | Macroscopically normal. |
| 7 Days | 51610 | 1.5 x 1.0 cm skull flap sutured to defect in caudal midline calvarium; 0.5 cm dark red flat foci at rostral and caudal defect; rim of slight purple discoloration around deep defect, slight white opaque thickening of meninges deep to rim of defect. |
| 51611 | 1.5 x 1.0 cm bone flap sutured to caudal midline calvarium defect; 0.5 cm dark red blood clot at caudal cerebral midline-cerebrum junction. |
| 51612 | 1.5 x 1.0 cm bone flap sutured to defect in caudal midline calvarium; extensive bruising 2.0 cm rostral and 2.0 cm caudal to defect at superficial surface and up to 0.5 cm wide; 0.5 cm diameter region of bruising and slight meningeal thickening deep to defect. |

**Supplementary Table 3.** **Macroscopic Necropsy Observations Following Irrigation of Pericardium**

| **Group** | **Time Point- Post Irrigation** | **Animal Number** | **Macroscopic Observations** |
| --- | --- | --- | --- |
| 5- Control | 30 Minutes | 51613 | Cranial lung lobe on both sides are mottled different shades of red. |
| 51614 | Lungs diffusely mottled different shades of red, more prominently on the left; air in stomach. |
| 51617 | Pericardial fat was edematous with a small amount of hemorrhage; thoracic cavity contained ~5 mL of irrigation solution; lungs were multifocally to diffusely congested; trachea mucosa was diffusely red. |
| 24 Hours | 51619 | Macroscopically normal |
| 51621 | 0.7 x 0.7 x 0.5 cm blood clot at the thoracotomy site. |
| 51622 | Small area (~1.0 x 0.4 x 0.1 cm) of fibrin adhesions between pericardium and thoracotomy site; both thoracic cavities had ~2 to 3 mLs of thin red cloudy fluid. |
| 51625 | Pericardial sac had small amount of clear, transparent fluid; left and right cranial lung lobes collapsed, slightly firm, grey; approximately 12.0 mL dark, red opaque fluid in left thoracic cavity (containing clots); approximately 5.5 mL pink, translucent, slightly flocculent fluid in right thoracic cavity; 0.5 x 1.0 cm dark red/pink mottled slightly raised tissues at thoracotomy site. |
| 7 Days | 51627 | 6.5 mL frank blood, left thoracic cavity; 3.0 mL frank blood, right thoracic cavity; incision at thoracotomy site closed, ~1.0 cm long, minimal clotted blood on deep margins. |
| 51628 | 4.0 mL frank blood in left thorax; 1.1 mL pink-tinged clear fluid on right thorax; healing thoracotomy incisions, closed, ~1.0 cm long. |
| 51630 | Small amount of dark red fluid in pericardial sac; both lungs bright pink; healed thoracotomy incision on left wall. |
| 51631 | Approximately 10 mL of frank blood in the left chest cavity; few thin fibrin adhesions between chest wall and pericardial site; ~1/2 of left cranial lung lobe was consolidated; small amount of redness on the surface of left caudal lung lobe, at the caudal region; thoracotomy site noted. |
| 6 - Test | 30 Minutes | 51615 | Right cranial lung lobe dark red and collapsed; gastric juice present in ET tube; air in stomach. |
| 51616 | Pericardial sac slightly thickened and gelatinous; right cranial lung lobe and right diaphragmatic lung lobe mottled different shades of red; left diaphragmatic lung lobe diffuse, slightly dark red; discoloration around the thoracotomy site, brown and granular. |
| 51618 | Pericardial fat was edematous; small amount of brown granular material on lungs and thoracic wall (irrigation material); lungs were diffusely congested, as was tracheal mucosa. |
| 24 Hours | 51620 | Approximately cranial half of left cranial lung lobe was adhered to pericardium and thoracotomy site; thoracic cavity had ~3 mL on left side and ~2 mL on right side of thin, red, cloudy fluid; fibrin deposits on thoracotomy site. |
| 51623 | Left cranial lung lobe was diffusely adhered to thoracotomy site and pericardium; lung was mildly consolidated/congested; pericardium was diffusely edematous; left thoracic cavity contained ~7 mL of thin red fluid and right thoracic cavity had ~2 mL of this same fluid; thin layer of blood and fibrin covering thoracotomy site. |
| 51624 | Pericardium at thoracotomy site was adhered to thoracotomy site; pericardium was diffusely edematous; tip of left lung lobe was adhered to pericardium; ~2 mLs of thin, red fluid in left thoracic cavity and a very small amount (~0.5 mL) of this same fluid in right thoracic cavity; thin layer of blood and brown material covering thoracotomy site. |
| 51626 | Small amount clear transparent pericardial fluid; left cranial lung and left middle lung mottled dark pink to red, swollen heavy wet with greater than 5 up to 0.5 cm emphysematous bullae; 3.0 cm fibrinous adhesion to chest wall incision, 1.0 cm fibrinous adhesion to pericardium, 2.5 cm fibrinous adhesion to left middle lobe, all from left cranial lobe; 6.0 cm sutured skin incision, left cranial thorax, vertical; 16.5 mL dark pink transparent fluid in left thoracic cavity; 10.0 mL clear light pink transparent fluid in right thoracic cavity. |
| 7 Days | 51629 | 1.0 mL blood-tinged fluid in pericardial sac; five fibrous adhesions attaching left caudal lung to thoracotomy incision; ~30.0 mL frank blood in left thorax; thick pleura overlying left lung, mottled pink/dark red left lung, partially collapsed; more adhesions from thoracotomy site to left middle lung; ~1.0 cm sutured thoracotomy incision at left chest wall; ~0.5 cm diameter clear fluid pocket within panniculus muscle at thoracotomy site. |
| 51632 | Approximately 22 mLs of thin red fluid in left chest cavity; whole left side of pericardium was adhered to chest wall and thoracotomy site; left lung was mildly collapsed. |
|  | 51633 | 20.0 mL blood-tinged fluid in left thorax; minimal clear fluid in right thorax; minimal red-tinged fluid in pericardial sac; left lung lobes dark red, partially collapsed; extensive fibrous adhesions between lungs/pericardium on left side to thoracotomy, left chest wall, and diaphragm. |
| 51634 | Left lung dark red, partially collapsed; 3.0 cm sutured thoracotomy incision; 25.0 mL blood-tinged fluid in left thorax; 1.7 mL pink-tinged fluid in right thorax; extensive fibrous adhesions between left lung lobes, pericardium, thoracotomy site and diaphragm. |

**Supplementary Table 4.** **Histopathological Scoring of Articular Cartilage Irrigated Sites in Group 1 (Control Article) Across Time Points**

|  | **30 Minutes** | | | **24 Hours** | | | **7 Days** | | |
| --- | --- | --- | --- | --- | --- | --- | --- | --- | --- |
| Animal Number | 51638 | 51639 | 51640 | 51644 | 51645 | 51646 | 51650 | 51651 | 51652 |
| **Inflammation (I)** |  | | | | | | | | |
| Polymorphonuclear cells (PMNs) | 0 | 0 | 0 | 0 | 1 | 1 | 3 | 0 | 1 |
| Lymphocytes | 1 | 1 | 1 | 1 | 1 | 1 | 1 | 1 | 1 |
| Plasma Cells | 0 | 0 | 0 | 0 | 0 | 0 | 0 | 0 | 0 |
| Eosinophils | 0 | 0 | 0 | 0 | 0 | 0 | 0 | 0 | 0 |
| Macrophages | 1 | 1 | 1 | 1 | 1 | 1 | 1 | 2 | 1 |
| Multinucleated Giant Cells | 0 | 0 | 0 | 0 | 0 | 0 | 0 | 0 | 0 |
| Necrosis | 0 | 0 | 0 | 0 | 0 | 0 | 0 | 0 | 0 |
| Inflammation (I) Subtotal | 2 | 2 | 2 | 2 | 3 | 3 | 6 | 2 | 3 |
| **Tissue Response (TR)** |  | | | | | | | | |
| Neovascularization | 2 | 2 | 2 | 1 | 1 | 2 | 2 | 3 | 3 |
| Fibrosis / Fibrous band | 1 | 1 | 2 | 2 | 1 | 2 | 4 | 1 | 3 |
| Tissue Response (TR) Subtotal | 3 | 3 | 4 | 3 | 2 | 4 | 6 | 4 | 6 |
|  |  | | | | | | | | |
| Total (I + TR) | 5 | 5 | 6 | 5 | 5 | 7 | 12 | 6 | 9 |
| Sum of Total Scores | 16 | | | 17 | | | 27 | | |
| No. of Sites Scored | 3 | | | 3 | | | 3 | | |
| Group Average | 5.3 | | | 5.7 | | | 9.0 | | |
|  |  | | | | | | | | |
| **Mean Fibrous Band Thickness (µm)** | 35 | 51 | 165 | 200 | 74 | 182 | 351 | 100 | 209 |
|  |  | | | | | | | | |
| **Granuloma Formation** | 0 | 0 | 0 | 0 | 0 | 0 | 0 | 0 | 0 |
| **Traumatic Myofiber Changes** | 0 | 0 | 0 | 0 | 0 | 0 | 0 | 0 | 0 |
| **Fatty Infiltration** | 0 | 0 | 0 | 0 | 0 | 0 | 0 | 0 | 0 |
| **Bone Formation** | 0 | 0 | 0 | 0 | 0 | 0 | 0 | 0 | 0 |
| **Tissue Ingrowth into Irrigated Material** | 0 | 0 | 0 | 0 | 0 | 0 | 0 | 0 | 0 |
| **Soft Tissue Mineralization** | 0 | 0 | 0 | 0 | 0 | 0 | 0 | 0 | 0 |
| **Subacute/Chronic Hemorrhage** | 0 | 0 | 0 | 0 | 0 | 0 | 2 | 0 | 0 |
| **Foreign Material (other than irrigated material)** | 0 | 0 | 0 | 0 | 0 | 0 | 0 | 0 | 0 |

**Supplementary Table 5.** **Histopathological Scoring of Articular Cartilage Irrigated Sites in Group 2 (Test Article) Across Time Points**

|  | **30 Minutes** | | | **24 Hours** | | | **7 Days** | | |
| --- | --- | --- | --- | --- | --- | --- | --- | --- | --- |
| Animal Number | 51641 | 51642 | 51643 | 51647 | 51648 | 51649 | 51654 | 51655 | 51656 |
| **Inflammation (I)** |  | | | | | | | | |
| Polymorphonuclear cells (PMNs) | 0 | 0 | 0 | 2 | 2 | 1 | 0 | 1 | 1 |
| Lymphocytes | 1 | 1 | 1 | 1 | 1 | 1 | 1 | 2 | 1 |
| Plasma Cells | 1 | 1 | 1 | 0 | 0 | 0 | 0 | 0 | 0 |
| Eosinophils | 0 | 1 | 1 | 0 | 0 | 0 | 1 | 2 | 2 |
| Macrophages | 1 | 1 | 1 | 1 | 1 | 1 | 1 | 1 | 2 |
| Multinucleated Giant Cells | 0 | 0 | 0 | 0 | 0 | 0 | 0 | 0 | 1 |
| Necrosis | 0 | 0 | 0 | 0 | 0 | 0 | 0 | 0 | 0 |
| Inflammation (I) Subtotal | 3 | 2 | 2 | 4 | 4 | 3 | 2 | 6 | 5 |
| **Tissue Response (TR)** |  | | | | | | | | |
| Neovascularization | 2 | 1 | 1 | 2 | 1 | 1 | 3 | 3 | 3 |
| Fibrosis / Fibrous band | 4 | 1 | 1 | 1 | 1 | 1 | 1 | 1 | 2 |
| Tissue Response (TR) Subtotal | 6 | 2 | 2 | 3 | 2 | 2 | 4 | 4 | 5 |
|  |  | | | | | | | | |
| Total (I + TR) | 9 | 4 | 4 | 7 | 6 | 5 | 6 | 10 | 10 |
| Sum of Total Scores | 17 | | | 18 | | | 26 | | |
| No. of Sites Scored | 3 | | | 3 | | | 3 | | |
| Group Average | 5.7 | | | 6.0 | | | 8.7 | | |
|  |  | | | | | | | | |
| **Mean Fibrous Band Thickness (µm)** | 311 | 97 | 89 | 42 | 45 | 74 | 53 | 100 | 190 |
| **Granuloma Formation** | 0 | 0 | 0 | 0 | 0 | 0 | 0 | 0 | 0 |
| **Traumatic Myofiber Changes** | 0 | 0 | 0 | 0 | 0 | 0 | 0 | 0 | 0 |
| **Fatty Infiltration** | 0 | 0 | 0 | 0 | 0 | 0 | 0 | 0 | 0 |
| **Bone Formation** | 0 | 0 | 0 | 0 | 0 | 0 | 0 | 0 | 0 |
| **Tissue Ingrowth into Irrigated Material** | 0 | 0 | 0 | 0 | 0 | 0 | 0 | 0 | 0 |
| **Soft Tissue Mineralization** | 0 | 0 | 0 | 0 | 0 | 0 | 0 | 1 | 3 |
| **Subacute/Chronic Hemorrhage** | 0 | 0 | 0 | 0 | 0 | 0 | 0 | 1 | 3 |
| **Foreign Material (other than irrigated material)** | 0 | 0 | 0 | 0 | 0 | 0 | 0 | 0 | 0 |

**Supplementary Table 6. Histopathological Scoring of Dura Mater Irrigated Sites in Group 3 (Control Article) Across Time Points**

|  | **30 Minutes** | | | **24 Hours** | | | **7 Days** | | |
| --- | --- | --- | --- | --- | --- | --- | --- | --- | --- |
| Animal Number | 51657 | 51658 | 51659 | 51601 | 51602 | 51603 | 51607 | 51608 | 51609 |
| **Inflammation (I)** |  | | | | | | | | |
| Polymorphonuclear cells (PMNs) | 0 | 1 | 0 | 1 | 0 | 1 | 0 | 0 | 0 |
| Lymphocytes | 1 | 1 | 1 | 1 | 1 | 1 | 1 | 1 | 1 |
| Plasma Cells | 0 | 0 | 0 | 0 | 0 | 0 | 0 | 0 | 0 |
| Eosinophils | 0 | 0 | 0 | 0 | 0 | 0 | 0 | 0 | 0 |
| Macrophages | 1 | 1 | 1 | 1 | 1 | 1 | 2 | 1 | 2 |
| Multinucleated Giant Cells | 0 | 1 | 0 | 0 | 0 | 0 | 0 | 0 | 0 |
| Necrosis | 0 | 0 | 0 | 0 | 0 | 0 | 0 | 0 | 0 |
| Inflammation (I) Subtotal | 2 | 4 | 2 | 3 | 2 | 3 | 3 | 2 | 3 |
| **Tissue Response (TR)** |  | | | | | | | | |
| Neovascularization | 0 | 0 | 0 | 1 | 1 | 2 | 4 | 4 | 4 |
| Fibrosis / Fibrous band | 1 | 1 | 1 | 2 | 1 | 2 | 2 | 3 | 2 |
| Tissue Response (TR) Subtotal | 1 | 1 | 1 | 3 | 2 | 4 | 6 | 7 | 6 |
|  |  | | | | | | | | |
| Total (I + TR) | 3 | 5 | 3 | 6 | 4 | 7 | 9 | 9 | 9 |
| Sum of Total Scores | 11 | | | 17 | | | 27 | | |
| No. of Sites Scored | 3 | | | 3 | | | 3 | | |
| Group Average | 3.7 | | | 5.7 | | | 9.0 | | |
|  |  | | | | | | | | |
| **Mean Fibrous Band Thickness (µm)** | 38 | 67 | 97 | 111 | 75 | 104 | 198 | 243 | 200 |
|  |  | | | | | | | | |
| **Granuloma Formation** | 0 | 0 | 0 | 0 | 0 | 0 | 0 | 0 | 0 |
| **Traumatic Myofiber Changes** | 0 | 0 | 0 | 0 | 0 | 0 | 0 | 0 | 0 |
| **Fatty Infiltration** | 0 | 0 | 0 | 0 | 0 | 0 | 0 | 0 | 0 |
| **Bone Formation** | 0 | 0 | 0 | 0 | 0 | 0 | 1 | 1 | 1 |
| **Tissue Ingrowth into Irrigated Material** | 0 | 0 | 0 | 0 | 0 | 0 | 0 | 0 | 0 |
| **Soft Tissue Mineralization** | 0 | 0 | 0 | 0 | 0 | 0 | 0 | 0 | 0 |
| **Subacute/Chronic Hemorrhage** | 0 | 0 | 0 | 0 | 0 | 0 | 2 | 0 | 0 |
| **Foreign Material (other than Irrigated material)** | 0 | 0 | 0 | 0 | 0 | 0 | 0 | 0 | 1 |

**Supplementary Table 7. Histopathological Scoring of Dura Mater Irrigated Sites in Group 4 (Test Article) Across Time Points**

|  | **30 Minutes** | | | **24 Hours** | | | **7 Days** | | |
| --- | --- | --- | --- | --- | --- | --- | --- | --- | --- |
| Animal Number | 51660 | 51661 | 51600 | 51604 | 51605 | 51606 | 51610 | 51611 | 51612 |
| **Inflammation (I)** |  | | | | | | | | |
| Polymorphonuclear cells (PMNs) | 1 | 0 | 0 | 0 | 1 | 1 | 0 | 0 | 0 |
| Lymphocytes | 1 | 1 | 1 | 1 | 1 | 1 | 1 | 1 | 1 |
| Plasma Cells | 0 | 0 | 0 | 0 | 0 | 0 | 0 | 0 | 0 |
| Eosinophils | 0 | 0 | 0 | 0 | 0 | 0 | 0 | 0 | 0 |
| Macrophages | 1 | 1 | 1 | 0 | 1 | 1 | 1 | 2 | 2 |
| Multinucleated Giant Cells | 0 | 1 | 0 | 0 | 0 | 0 | 0 | 0 | 0 |
| Necrosis | 0 | 0 | 0 | 0 | 0 | 0 | 0 | 0 | 0 |
| Inflammation (I) Subtotal | 3 | 2 | 2 | 1 | 3 | 3 | 2 | 3 | 3 |
| **Tissue Response (TR)** |  | | | | | | | | |
| Neovascularization | 0 | 0 | 0 | 0 | 1 | 2 | 4 | 3 | 4 |
| Fibrosis / Fibrous band | 2 | 1 | 1 | 1 | 1 | 2 | 4 | 2 | 2 |
| Tissue Response (TR) Subtotal | 2 | 1 | 1 | 1 | 2 | 4 | 8 | 5 | 6 |
|  |  | | | | | | | | |
| Total (I + TR) | 5 | 3 | 3 | 2 | 5 | 7 | 10 | 8 | 9 |
| Sum of Total Scores | 11 | | | 14 | | | 27 | | |
| No. of Sites Scored | 3 | | | 3 | | | 3 | | |
| Group Average | 3.7 | | | 4.7 | | | 9.0 | | |
|  |  | | | | | | | | |
| **Mean Fibrous Band Thickness (µm)** | 109 | 93 | 14 | 58 | 80 | 102 | 312 | 119 | 146 |
|  |  | | | | | | | | |
| **Granuloma Formation** | 0 | 0 | 0 | 0 | 0 | 0 | 0 | 0 | 0 |
| **Traumatic Myofiber Changes** | 0 | 0 | 0 | 0 | 0 | 0 | 0 | 0 | 0 |
| **Fatty Infiltration** | 0 | 0 | 0 | 0 | 0 | 0 | 0 | 0 | 0 |
| **Bone Formation** | 0 | 0 | 0 | 0 | 0 | 0 | 1 | 1 | 1 |
| **Tissue Ingrowth into Irrigated Material** | 0 | 0 | 0 | 0 | 0 | 0 | 0 | 0 | 0 |
| **Soft Tissue Mineralization** | 0 | 0 | 0 | 0 | 0 | 0 | 0 | 0 | 0 |
| **Subacute/Chronic Hemorrhage** | 0 | 0 | 0 | 0 | 0 | 0 | 0 | 0 | 0 |
| **Foreign Material (other than irrigated material)** | 0 | 0 | 0 | 0 | 0 | 0 | 0 | 0 | 0 |

**Supplementary Table 8.** **Histopathological Scoring of Pericardium Irrigated Sites in Group 5 (Control Article) Across Time Points**

|  | **30 Minutes** | | | **24 Hours** | | | | **7 Days** | | | | |
| --- | --- | --- | --- | --- | --- | --- | --- | --- | --- | --- | --- | --- |
| Animal Number | 51613 | 51614 | 51617 | 51619 | 51621 | 51622 | 51625 | 51627 | 51628 | 51630 | | 51631 |
| **Inflammation (I)** |  | | |  | | | |  | | | | |
| Polymorphonuclear cells (PMNs) | 0 | 0 | 0 | 2 | 2 | 2 | 3 | 4 | 1 | 0 | 3 | |
| Lymphocytes | 1 | 1 | 1 | 1 | 1 | 1 | 2 | 2 | 3 | 1 | 2 | |
| Plasma Cells | 0 | 0 | 0 | 1 | 0 | 0 | 1 | 1 | 1 | 1 | 1 | |
| Eosinophils | 0 | 0 | 0 | 0 | 0 | 0 | 0 | 0 | 0 | 0 | 0 | |
| Macrophages | 1 | 0 | 1 | 2 | 1 | 2 | 2 | 3 | 3 | 2 | 3 | |
| Multinucleated Giant Cells | 0 | 0 | 0 | 0 | 0 | 0 | 0 | 1 | 0 | 0 | 1 | |
| Necrosis | 0 | 0 | 1 | 1 | 1 | 1 | 1 | 2 | 0 | 0 | 1 | |
| Inflammation (I) Subtotal | 2 | 1 | 2 | 7 | 5 | 6 | 9 | 13 | 8 | 4 | 11 | |
| **Tissue Response (TR)** |  | | |  | | | |  | | | | |
| Neovascularization | 0 | 1 | 1 | 1 | 1 | 0 | 2 | 3 | 3 | 2 | | 4 |
| Fibrosis / Fibrous band | 0 | 1 | 0 | 1 | 1 | 2 | 3 | 3 | 2 | 2 | | 3 |
| Tissue Response (TR) Subtotal | 0 | 2 | 1 | 2 | 1 | 4 | 6 | 6 | 5 | 4 | | 7 |
|  |  | | |  | | | |  | | | | |
| Total (I + TR) | 2 | 3 | 3 | 9 | 6 | 10 | 15 | 19 | 13 | 8 | | 18 |
| Sum of Total Scores | 8 | | | 40 | | | | 58 | | | | |
| No. of Sites Scored | 3 | | | 4 | | | | 4 | | | | |
| Group Average | 2.7 | | | 10.0 | | | | 14.5 | | | | |
|  |  | | |  | | | |  | | | | |
| **Mean Fibrous Band Thickness (µm)** | 0 | 95 | 0 | 66 | 79 | 163 | 256 | 279 | 149 | 152 | | 210 |
|  |  | | |  | | | |  | | | | |
| **Granuloma Formation** | 0 | 0 | 0 | 0 | 0 | 0 | 0 | 0 | 0 | 0 | | 0 |
| **Traumatic Myofiber Changes** | 0 | 0 | 0 | 1 | 1 | 1 | 2 | 3 | 0 | 0 | | 1 |
| **Fatty Infiltration** | 0 | 0 | 0 | 0 | 0 | 0 | 0 | 0 | 0 | 0 | | 0 |
| **Bone Formation** | 0 | 0 | 0 | 0 | 0 | 0 | 0 | 1 | 0 | 0 | | 0 |
| **Tissue Ingrowth into Irrigated Material** | 0 | 0 | 0 | 0 | 0 | 0 | 0 | 0 | 0 | 0 | | 0 |
| **Soft Tissue Mineralization** | 0 | 0 | 0 | 0 | 0 | 0 | 0 | 1 | 0 | 0 | | 0 |
| **Subacute/Chronic Hemorrhage** | 0 | 0 | 0 | 0 | 0 | 0 | 0 | 1 | 0 | 1 | | 0 |
| **Foreign Material (other than irrigated material)** | 0 | 0 | 0 | 0 | 0 | 0 | 0 | 1 | 0 | 0 | | 0 |

**Supplementary Table 9.** **Histopathological Scoring of Pericardium Irrigated Sites in Group 6 (Test Article) Across Time Points**

|  | **30 Minutes** | | | **24 Hours** | | | | **7 Days** | | | | |
| --- | --- | --- | --- | --- | --- | --- | --- | --- | --- | --- | --- | --- |
| Animal Number | 51615 | 51616 | 51618 | 51620 | 51623 | 51624 | 51626 | 51629 | 51632 | 51633 | | 51634 |
| **Inflammation (I)** |  | | |  | | | |  | | | | |
| Polymorphonuclear cells (PMNs) | 1 | 1 | 0 | 1 | 3 | 3 | 3 | 2 | 1 | 2 | 1 | |
| Lymphocytes | 1 | 1 | 1 | 1 | 1 | 1 | 1 | 1 | 2 | 2 | 2 | |
| Plasma Cells | 0 | 0 | 0 | 0 | 0 | 0 | 0 | 0 | 1 | 1 | 1 | |
| Eosinophils | 0 | 0 | 0 | 0 | 0 | 0 | 0 | 0 | 0 | 0 | 0 | |
| Macrophages | 1 | 0 | 0 | 1 | 2 | 1 | 2 | 3 | 3 | 3 | 3 | |
| Multinucleated Giant Cells | 0 | 0 | 0 | 0 | 0 | 0 | 0 | 1 | 1 | 1 | 1 | |
| Necrosis | 0 | 0 | 0 | 0 | 1 | 1 | 1 | 1 | 0 | 0 | 0 | |
| Inflammation (I) Subtotal | 3 | 1 | 3 | 6 | 7 | 6 | 6 | 7 | 10 | 8 | 8 | |
| **Tissue Response (TR)** |  | | |  | | | |  | | | | |
| Neovascularization | 1 | 1 | 1 | 1 | 0 | 1 | 3 | 1 | 3 | 4 | | 4 |
| Fibrosis / Fibrous band | 0 | 1 | 0 | 0 | 2 | 3 | 2 | 2 | 4 | 3 | | 4 |
| Tissue Response (TR) Subtotal | 1 | 2 | 1 | 1 | 2 | 4 | 5 | 2 | 7 | 7 | | 8 |
|  |  | | |  | | | |  | | | | |
| Total (I + TR) | 4 | 3 | 4 | 8 | 11 | 11 | 15 | 7 | 14 | 17 | | 16 |
| Sum of Total Scores | 11 | | | 38 | | | | 62 | | | | |
| No. of Sites Scored | 3 | | | 4 | | | | 4 | | | | |
| Group Average | 3.7 | | | 9.5 | | | | 15.5 | | | | |
|  |  | | |  | | | |  | | | | |
| **Mean Fibrous Band Thickness (µm)** | 0 | 56 | 0 | 138 | 201 | 119 | 82 | 403 | 259 | 260 | | 502 |
|  |  | | |  | | | |  | | | | |
| **Granuloma Formation** | 0 | 0 | 0 | 0 | 0 | 0 | 0 | 0 | 0 | 0 | | 0 |
| **Traumatic Myofiber Changes** | 0 | 0 | 0 | 2 | 3 | 1 | 1 | 1 | 2 | 2 | | 2 |
| **Fatty Infiltration** | 0 | 0 | 0 | 0 | 0 | 0 | 0 | 0 | 0 | 0 | | 0 |
| **Bone Formation** | 0 | 0 | 0 | 0 | 0 | 0 | 0 | 0 | 0 | 1 | | 1 |
| **Tissue Ingrowth into Irrigated Material** | 0 | 0 | 0 | 0 | 0 | 0 | 0 | 0 | 0 | 0 | | 0 |
| **Soft Tissue Mineralization** | 0 | 0 | 0 | 0 | 0 | 0 | 0 | 0 | 0 | 0 | | 0 |
| **Subacute/Chronic Hemorrhage** | 0 | 0 | 0 | 0 | 0 | 0 | 0 | 3 | 0 | 1 | | 1 |
| **Foreign Material (other than irrigated material)** | 0 | 0 | 0 | 0 | 0 | 0 | 0 | 0 | 0 | 0 | | 0 |

**Supplementary Table 10.** **Irritant Rank Scores for Articular Cartilage Irrigated Sites Across Time Points**

|  | **Irrigated Sites** | | | **Untreated Sites** | | |
| --- | --- | --- | --- | --- | --- | --- |
| **30 Minutes** | **24 Hours** | **7 Days** | **30 Minutes** | **24 Hours** | **7 Days** |
| **Test Article** | | | | | | |
| **Total Test Scores** | 17 | 18 | 26 | 17 | 18 | 26 |
| **Number of Test Sites Scored** | 3 | 3 | 3 | 3 | 3 | 3 |
| **Test Group Average Score** | 5.7 | 6.0 | 8.7 | 5.7 | 6.0 | 8.7 |
| **Control Article** | | | | | | |
| **Total Control Scores** | 16 | 17 | 27 | 28 | 34 | 31 |
| **Number of Control Sites Scored** | 3 | 3 | 3 | 6 | 6 | 6 |
| **Control Group Average Score** | 5.3 | 5.7 | 9.0 | 4.7 | 5.7 | 5.2 |
|  | | | | | | |
| **Irritant Rank Score** | 0.4 | 0.3 | -0.3 | 1.0 | 0.3 | 3.5 |
| **Interpretation of the Irritant Rank Score** | Non-Irritant | Non-Irritant | Non-Irritant | Non-Irritant | Non-Irritant | Slight Irritant |

Group Average = the sum of the total scores for that group, divided by the number of irrigated sites, rounded to the nearest 10th decimal point.

**Supplementary Table 11: Irritant Rank Scores for Mesentery Irrigated Sites Across Time Points**

|  | **Irrigated Sites** | | | **Untreated Sites** | | |
| --- | --- | --- | --- | --- | --- | --- |
| **30 Minutes** | **24 Hours** | **7 Days** | **30 Minutes** | **24 Hours** | **7 Days** |
| **Test Article** | | | | | | |
| **Total Test Scores** | 11 | 10 | 11 | 11 | 10 | 11 |
| **Number of Test Sites Scored** | 3 | 3 | 3 | 3 | 3 | 3 |
| **Test Group Average Score** | 3.7 | 3.3 | 3.7 | 3.7 | 3.3 | 3.7 |
| **Control Article** | | | | | | |
| **Total Control Scores** | 6 | 6 | 8 | 14 | 4 | 3 |
| **Number of Control Sites Scored** | 3 | 3 | 3 | 6 | 6 | 6 |
| **Control Group Average Score** | 2.0 | 2.0 | 2.7 | 2.3 | 0.7 | 0.5 |
|  | | | | | | |
| **Irritant Rank Score** | 1.7 | 1.3 | 1.0 | 1.4 | 2.6 | 3.2 |
| **Interpretation of the Irritant Rank Score** | Non-Irritant | Non-Irritant | Non-Irritant | Non-Irritant | Non-Irritant | Slight Irritant |

Group Average = the sum of the total scores for that group, divided by the number of irrigatedsites, rounded to the nearest 10th decimal point.

**Supplementary Table 12: Irritant Rank Scores for Dura Mater Irrigated Sites Across Time Points**

|  | **Irrigated Sites** | | | **Untreated Sites** | | |
| --- | --- | --- | --- | --- | --- | --- |
| **30 Minutes** | **24 Hours** | **7 Days** | **30 Minutes** | **24 Hours** | **7 Days** |
| **Test Article** | | | | | | |
| **Total Test Scores** | 11 | 14 | 27 | 11 | 14 | 27 |
| **Number of Test Sites Scored** | 3 | 3 | 3 | 3 | 3 | 3 |
| **Test Group Average Score** | 3.7 | 4.7 | 9.0 | 3.7 | 4.7 | 9.0 |
| **Control Article** | | | | | | |
| **Total Control Scores** | 11 | 17 | 27 | 19 | 26 | 23 |
| **Number of Control Sites Scored** | 3 | 3 | 3 | 6 | 6 | 8 |
| **Control Group Average Score** | 3.7 | 5.7 | 9.0 | 3.2 | 3.3 | 2.9 |
|  | | | | | | |
| **Irritant Rank Score** | 0.0 | -1.0 | 0.0 | 0.5 | 1.4 | 6.1 |
| **Interpretation of the Irritant Rank Score** | Non-Irritant | Non-Irritant | Non-Irritant | Non-Irritant | Non-Irritant | Slight Irritant |

Group Average = the sum of the total scores for that group, divided by the number of lavage sites, rounded to the nearest 10th decimal point.

**Supplementary Table 13: Irritant Rank Scores for Pericardium Irrigated Sites Across Time Points**

|  | **Irrigated Sites** | | | **Untreated Sites** | | |
| --- | --- | --- | --- | --- | --- | --- |
| **30 Minutes** | **24 Hours** | **7 Days** | **30 Minutes** | **24 Hours** | **7 Days** |
| **Test Article** | | | | | | |
| **Total Test Scores** | 11 | 38 | 62 | 11 | 38 | 62 |
| **Number of Test Sites Scored** | 3 | 4 | 4 | 3 | 4 | 4 |
| **Test Group Average Score** | 3.7 | 9.5 | 15.5 | 3.7 | 9.5 | 15.5 |
| **Control Article** | | | | | | |
| **Total Control Scores** | 8 | 40 | 58 | 24 | 19 | 11 |
| **Number of Control Sites Scored** | 3 | 4 | 4 | 6 | 6 | 6 |
| **Control Group Average Score** | 2.7 | 10.0 | 14.5 | 4.0 | 3.2 | 1.8 |
|  | | | | | | |
| **Irritant Rank Score** | 1.0 | -0.5 | 1.0 | -0.3 | 6.3 | 13.7 |
| **Interpretation of the Irritant Rank Score** | Non-Irritant | Non-Irritant | Non-Irritant | Non-Irritant | Slight Irritant | Moderate Irritant |

Group Average = the sum of the total scores for that group, divided by the number of irrigated sites, rounded to the nearest 10th decimal point.
